# Supplementary material for: Mapping the Early Dispersal Patterns of SARS-CoV-2 Omicron BA.4 and BA.5 Subvariants in the Absence of Travel Restrictions and Testing at the Borders in Europe
Source: MDPI journal article supplement (doi:10.3390/v15010133), 2022-12-31
Supplement: s1 [file s1]

## **Supplementary materials for:**

### **Mapping the early dispersal patterns of SARS-CoV-2 omicron BA.4 and BA.5 subvariants in the absence of travel restrictions and testing at the borders in Europe**

**Kostaki EG, Mossialos E, Tseti I, Sfikakis PP, Paraskevis D**

## **Contents:**

|                                                                                                                      |           |
|----------------------------------------------------------------------------------------------------------------------|-----------|
| <b>Supplementary Table S1.</b> Earliest and latest sampling dates for the SARS-CoV-2 BA.4 sequences under study..... | <b>2</b>  |
| <b>Supplementary Table S2.</b> Earliest and latest sampling dates for the SARS-CoV-2 BA.5 sequences under study..... | <b>3</b>  |
| <b>Supplementary Table S3.</b> Accession numbers for the SARS-CoV-2 BA.4 sequences under study .....                 | <b>4</b>  |
| <b>Supplementary Table S4.</b> Accession numbers for the SARS-CoV-2 BA.5 sequences under study .....                 | <b>12</b> |

**Supplementary Table S1.** Earliest and latest sampling dates for the SARS-Cov-2 BA.4 sequences under study.

| Country of sampling | Region of sampling | Earliest sampling date | Latest sampling date |
|---------------------|--------------------|------------------------|----------------------|
| Austria             |                    | 05/04/2022             | 05/05/2022           |
| Belgium             |                    | 29/03/2022             | 10/05/2022           |
| Denmark             |                    | 02/03/2022             | 08/05/2022           |
| France              |                    | 30/03/2022             | 02/05/2022           |
| Germany             |                    | 12/04/2022             | 09/05/2022           |
| Ireland             |                    | 30/04/2022             | 01/05/2022           |
| Italy               |                    | 20/04/2022             | 05/05/2022           |
| Luxembourg          |                    | 25/04/2022             | 25/04/2022           |
| Netherlands         |                    | 10/04/2022             | 05/05/2022           |
| Spain               |                    | 07/04/2022             | 06/05/2022           |
| Sweden              |                    | 04/05/2022             | 04/05/2022           |
| Switzerland         |                    | 04/04/2022             | 28/04/2022           |
| United Kingdom      | England            | 22/03/2022             | 10/05/2022           |
|                     | Northern Ireland   | 21/04/2022             | 21/04/2022           |
|                     | Scotland           | 22/03/2022             | 06/05/2022           |
|                     | Wales              | 11/04/2022             | 03/05/2022           |
| Australia           |                    | 31/03/2022             | 04/05/2022           |
| New Zealand         |                    | 27/04/2022             | 27/04/2022           |
| Israel              |                    | 20/04/2022             | 08/05/2022           |
| Singapore           |                    | 11/04/2022             | 06/05/2022           |
| Botswana            |                    | 12/04/2022             | 12/04/2022           |
| South Africa        |                    | 10/01/2022             | 09/05/2022           |
| Canada              |                    | 04/04/2022             | 30/04/2022           |
| Chile               |                    | 19/04/2022             | 19/04/2022           |
| USA                 |                    | 30/03/2022             | 09/05/2022           |

**Supplementary Table S2.** Earliest and latest sampling dates for the SARS-Cov-2 BA.5 sequences under study.

| Country of sampling | Region of sampling | Earliest sampling date | Latest sampling date |
|---------------------|--------------------|------------------------|----------------------|
| Austria             |                    | 20/04/2022             | 05/05/2022           |
| Belgium             |                    | 24/04/2022             | 10/05/2022           |
| Denmark             |                    | 15/04/2022             | 08/05/2022           |
| France              |                    | 28/03/2022             | 02/05/2022           |
| Germany             |                    | 16/03/2022             | 06/05/2022           |
| Iceland             |                    | 28/04/2022             | 30/04/2022           |
| Italy               |                    | 03/05/2022             | 03/05/2022           |
| Netherlands         |                    | 25/04/2022             | 06/05/2022           |
| Norway              |                    | 12/04/2022             | 12/04/2022           |
| Portugal            |                    | 30/03/2022             | 26/04/2022           |
| Spain               |                    | 15/04/2022             | 05/05/2022           |
| Switzerland         |                    | 11/04/2022             | 28/04/2022           |
| United Kingdom      | England            | 14/04/2022             | 09/05/2022           |
|                     | Northern Ireland   | 21/04/2022             | 22/04/2022           |
|                     | Scotland           | 14/04/2022             | 06/05/2022           |
| Australia           |                    | 13/04/2022             | 04/05/2022           |
| Israel              |                    | 21/04/2022             | 08/05/2022           |
| China               |                    | 08/04/2022             | 23/04/2022           |
| South Africa        |                    | 25/02/2022             | 09/05/2022           |
| Canada              |                    | 15/04/2022             | 15/04/2022           |
| USA                 |                    | 29/03/2022             | 10/05/2022           |

**Supplementary Table S3.** Accession numbers for the SARS-CoV-2 BA.4 sequences under study.

|          |          |          |          |
|----------|----------|----------|----------|
| 10807016 | 11867431 | 12006291 | 12043279 |
| 10860989 | 11867434 | 12006301 | 12043280 |
| 11270126 | 11867443 | 12006305 | 12043281 |
| 11275475 | 11867448 | 12006308 | 12043283 |
| 11331250 | 11867453 | 12006310 | 12043286 |
| 11542270 | 11867456 | 12006312 | 12043288 |
| 11542287 | 11867458 | 12012872 | 12043289 |
| 11542474 | 11867461 | 12012877 | 12043291 |
| 11542550 | 11867470 | 12012886 | 12043292 |
| 11542567 | 11867475 | 12012887 | 12043293 |
| 11542603 | 11867486 | 12012891 | 12043296 |
| 11550739 | 11867495 | 12012896 | 12067585 |
| 11604519 | 11867499 | 12012910 | 12086839 |
| 11645323 | 11867510 | 12012915 | 12097314 |
| 11674410 | 11867524 | 12012922 | 12097316 |
| 11674411 | 11867525 | 12012935 | 12097317 |
| 11674413 | 11867526 | 12012939 | 12097318 |
| 11674425 | 11867527 | 12012941 | 12097319 |
| 11674426 | 11873073 | 12012944 | 12097322 |
| 11674430 | 11903031 | 12013570 | 12097323 |
| 11674431 | 11903035 | 12043216 | 12097326 |
| 11674432 | 11903059 | 12043218 | 12097328 |
| 11674443 | 11913288 | 12043222 | 12097329 |
| 11674447 | 11984860 | 12043225 | 12097330 |
| 11674448 | 11984862 | 12043226 | 12097332 |
| 11674784 | 11984863 | 12043228 | 12097333 |
| 11752668 | 11988685 | 12043229 | 12097334 |
| 11763475 | 11990462 | 12043230 | 12097337 |
| 11763478 | 11994300 | 12043231 | 12097338 |
| 11763480 | 11999052 | 12043234 | 12097340 |
| 11763481 | 11999053 | 12043235 | 12097343 |
| 11763491 | 11999054 | 12043236 | 12097344 |
| 11763502 | 11999055 | 12043238 | 12097346 |
| 11773266 | 11999056 | 12043241 | 12097348 |
| 11773269 | 11999057 | 12043243 | 12097349 |
| 11773271 | 11999058 | 12043244 | 12097352 |
| 11773278 | 11999065 | 12043260 | 12097353 |
| 11825926 | 11999078 | 12043261 | 12097354 |
| 11825931 | 12006222 | 12043263 | 12097357 |
| 11825937 | 12006223 | 12043264 | 12097379 |
| 11825942 | 12006230 | 12043265 | 12097391 |
| 11832686 | 12006240 | 12043266 | 12097393 |
| 11866393 | 12006243 | 12043267 | 12099407 |
| 11867344 | 12006245 | 12043268 | 12109331 |
| 11867346 | 12006251 | 12043269 | 12116582 |
| 11867366 | 12006259 | 12043270 | 12119232 |
| 11867372 | 12006273 | 12043271 | 12122771 |
| 11867409 | 12006286 | 12043272 | 12123784 |
| 11867426 | 12006288 | 12043273 | 12130073 |
| 11867428 | 12006289 | 12043278 | 12139399 |

|          |          |          |          |
|----------|----------|----------|----------|
| 12149337 | 12274007 | 12293148 | 12307616 |
| 12152675 | 12274009 | 12293149 | 12307617 |
| 12169006 | 12274011 | 12293150 | 12307618 |
| 12169353 | 12274024 | 12293154 | 12307620 |
| 12179199 | 12274030 | 12293158 | 12307624 |
| 12180585 | 12274031 | 12293159 | 12307626 |
| 12180587 | 12274036 | 12293160 | 12307627 |
| 12180593 | 12274037 | 12293161 | 12307628 |
| 12206542 | 12274038 | 12293162 | 12307630 |
| 12208047 | 12274039 | 12293267 | 12307631 |
| 12208064 | 12274041 | 12293270 | 12307633 |
| 12211242 | 12274049 | 12293273 | 12307634 |
| 12212563 | 12274051 | 12293281 | 12307635 |
| 12212566 | 12274056 | 12293282 | 12307640 |
| 12212568 | 12274060 | 12293283 | 12307641 |
| 12212569 | 12274073 | 12293284 | 12307642 |
| 12212571 | 12274074 | 12293285 | 12307643 |
| 12217097 | 12274076 | 12293286 | 12307645 |
| 12221587 | 12274078 | 12293287 | 12307648 |
| 12223371 | 12274083 | 12293288 | 12307651 |
| 12226685 | 12274085 | 12293291 | 12307653 |
| 12226709 | 12274086 | 12293292 | 12307658 |
| 12241466 | 12274088 | 12293293 | 12307660 |
| 12248508 | 12274094 | 12295715 | 12307663 |
| 12252797 | 12274095 | 12307541 | 12307664 |
| 12252953 | 12274097 | 12307542 | 12307665 |
| 12256369 | 12274099 | 12307543 | 12307670 |
| 12264646 | 12274637 | 12307544 | 12307672 |
| 12264896 | 12278927 | 12307548 | 12307673 |
| 12266791 | 12278955 | 12307550 | 12307674 |
| 12267751 | 12278965 | 12307551 | 12307675 |
| 12267752 | 12278967 | 12307552 | 12307680 |
| 12267754 | 12278970 | 12307560 | 12307683 |
| 12267759 | 12278973 | 12307561 | 12307686 |
| 12268494 | 12278989 | 12307562 | 12307687 |
| 12268495 | 12280677 | 12307564 | 12307690 |
| 12268504 | 12280890 | 12307568 | 12307694 |
| 12268506 | 12281895 | 12307569 | 12307696 |
| 12273981 | 12281998 | 12307571 | 12307698 |
| 12273982 | 12283356 | 12307575 | 12307699 |
| 12273984 | 12286266 | 12307577 | 12307700 |
| 12273986 | 12292990 | 12307579 | 12307704 |
| 12273988 | 12292992 | 12307580 | 12307705 |
| 12273990 | 12293081 | 12307582 | 12307706 |
| 12273992 | 12293138 | 12307584 | 12307709 |
| 12273994 | 12293139 | 12307604 | 12307712 |
| 12273995 | 12293140 | 12307605 | 12307714 |
| 12273997 | 12293142 | 12307606 | 12307715 |
| 12274003 | 12293143 | 12307607 | 12307716 |
| 12274006 | 12293144 | 12307608 | 12307718 |

|          |          |          |          |
|----------|----------|----------|----------|
| 12307719 | 12401108 | 12426980 | 12472142 |
| 12307721 | 12401110 | 12435606 | 12472152 |
| 12307722 | 12401111 | 12436012 | 12472153 |
| 12307723 | 12401112 | 12436133 | 12472154 |
| 12317495 | 12401113 | 12442764 | 12472155 |
| 12318109 | 12401114 | 12445747 | 12472206 |
| 12335014 | 12401115 | 12450643 | 12472350 |
| 12339502 | 12401116 | 12450648 | 12473024 |
| 12340151 | 12401117 | 12450908 | 12473600 |
| 12344221 | 12401118 | 12451079 | 12473605 |
| 12347452 | 12401119 | 12454576 | 12473608 |
| 12361027 | 12401127 | 12456544 | 12473612 |
| 12361049 | 12401129 | 12456614 | 12473861 |
| 12368176 | 12401132 | 12456676 | 12473864 |
| 12376427 | 12401134 | 12456726 | 12473865 |
| 12396843 | 12401135 | 12456788 | 12473867 |
| 12401033 | 12401136 | 12456790 | 12473870 |
| 12401040 | 12401137 | 12456969 | 12473871 |
| 12401041 | 12401138 | 12462038 | 12473872 |
| 12401043 | 12401139 | 12462123 | 12473873 |
| 12401045 | 12401140 | 12465863 | 12473877 |
| 12401047 | 12401144 | 12466376 | 12473878 |
| 12401051 | 12401146 | 12469584 | 12473881 |
| 12401052 | 12401148 | 12469594 | 12473882 |
| 12401055 | 12401149 | 12469612 | 12473883 |
| 12401056 | 12401155 | 12469632 | 12473884 |
| 12401058 | 12401156 | 12469666 | 12473885 |
| 12401059 | 12401159 | 12469728 | 12473889 |
| 12401061 | 12401160 | 12469747 | 12474407 |
| 12401062 | 12401165 | 12469892 | 12474409 |
| 12401063 | 12401174 | 12470002 | 12474410 |
| 12401065 | 12401175 | 12471213 | 12474413 |
| 12401067 | 12401176 | 12471284 | 12474415 |
| 12401068 | 12401348 | 12472109 | 12474417 |
| 12401069 | 12401707 | 12472111 | 12474418 |
| 12401071 | 12401714 | 12472114 | 12474419 |
| 12401072 | 12401721 | 12472118 | 12474423 |
| 12401073 | 12416220 | 12472123 | 12474426 |
| 12401074 | 12416794 | 12472124 | 12474427 |
| 12401079 | 12421048 | 12472127 | 12474428 |
| 12401082 | 12426939 | 12472128 | 12474429 |
| 12401083 | 12426942 | 12472129 | 12474431 |
| 12401085 | 12426944 | 12472130 | 12474433 |
| 12401087 | 12426947 | 12472131 | 12474435 |
| 12401089 | 12426952 | 12472133 | 12474437 |
| 12401091 | 12426956 | 12472134 | 12474438 |
| 12401092 | 12426957 | 12472136 | 12474440 |
| 12401095 | 12426958 | 12472137 | 12474441 |
| 12401096 | 12426967 | 12472138 | 12474443 |
| 12401101 | 12426977 | 12472139 | 12474444 |

|          |          |          |          |
|----------|----------|----------|----------|
| 12474446 | 12477027 | 12515674 | 12527983 |
| 12474448 | 12477029 | 12515844 | 12529661 |
| 12474449 | 12477031 | 12515952 | 12531068 |
| 12474450 | 12477033 | 12516253 | 12531636 |
| 12474451 | 12477034 | 12518072 | 12532190 |
| 12474453 | 12477036 | 12519987 | 12533200 |
| 12474458 | 12477037 | 12519988 | 12533570 |
| 12474459 | 12477040 | 12519989 | 12533695 |
| 12474461 | 12477041 | 12519993 | 12533737 |
| 12474462 | 12477725 | 12519995 | 12534961 |
| 12474463 | 12478413 | 12519996 | 12534967 |
| 12474464 | 12478907 | 12519999 | 12534968 |
| 12474465 | 12479048 | 12520001 | 12534969 |
| 12474468 | 12481214 | 12520003 | 12534971 |
| 12474469 | 12482009 | 12520005 | 12534975 |
| 12474470 | 12483994 | 12520006 | 12534976 |
| 12474472 | 12484020 | 12520007 | 12534977 |
| 12474475 | 12490941 | 12520009 | 12534978 |
| 12474476 | 12493665 | 12520010 | 12534979 |
| 12474478 | 12496098 | 12520011 | 12534981 |
| 12474480 | 12496100 | 12520015 | 12534983 |
| 12474481 | 12496101 | 12520018 | 12534984 |
| 12474483 | 12496103 | 12520022 | 12534985 |
| 12474485 | 12496106 | 12520023 | 12534986 |
| 12474486 | 12496108 | 12520024 | 12534987 |
| 12474487 | 12496111 | 12520026 | 12534989 |
| 12474488 | 12496114 | 12520027 | 12534990 |
| 12474489 | 12496121 | 12520028 | 12534991 |
| 12474490 | 12496123 | 12520029 | 12534992 |
| 12475182 | 12496124 | 12520030 | 12534993 |
| 12475185 | 12497122 | 12520034 | 12534995 |
| 12475853 | 12497804 | 12520036 | 12534996 |
| 12476623 | 12502027 | 12520037 | 12534997 |
| 12476624 | 12502253 | 12520038 | 12534999 |
| 12476993 | 12502627 | 12520040 | 12535000 |
| 12476997 | 12505183 | 12520042 | 12535001 |
| 12476998 | 12505602 | 12520044 | 12535002 |
| 12476999 | 12505659 | 12520045 | 12535031 |
| 12477001 | 12507303 | 12520046 | 12535221 |
| 12477002 | 12507726 | 12520048 | 12535551 |
| 12477003 | 12507862 | 12520057 | 12536335 |
| 12477004 | 12511645 | 12520058 | 12536377 |
| 12477007 | 12512307 | 12520059 | 12546339 |
| 12477008 | 12512309 | 12520062 | 12546776 |
| 12477011 | 12514770 | 12520064 | 12547957 |
| 12477021 | 12514937 | 12520065 | 12548001 |
| 12477022 | 12515007 | 12520814 | 12548012 |
| 12477024 | 12515119 | 12523958 | 12548483 |
| 12477025 | 12515126 | 12523974 | 12548717 |
| 12477026 | 12515210 | 12526038 | 12550282 |

|          |          |          |          |
|----------|----------|----------|----------|
| 12553282 | 12559461 | 12576104 | 12587442 |
| 12553722 | 12559462 | 12576105 | 12587444 |
| 12555769 | 12559463 | 12576106 | 12587445 |
| 12555841 | 12559464 | 12576108 | 12587446 |
| 12557381 | 12560039 | 12576109 | 12587447 |
| 12558222 | 12560421 | 12578776 | 12587448 |
| 12558347 | 12562652 | 12578777 | 12587449 |
| 12558354 | 12563502 | 12580061 | 12587451 |
| 12558608 | 12563697 | 12582288 | 12587452 |
| 12558790 | 12563969 | 12582817 | 12587453 |
| 12558792 | 12567767 | 12585438 | 12587465 |
| 12558793 | 12570194 | 12585863 | 12587879 |
| 12558795 | 12570336 | 12585869 | 12587880 |
| 12558796 | 12570506 | 12585880 | 12587881 |
| 12558797 | 12571624 | 12585882 | 12587882 |
| 12558799 | 12571627 | 12585883 | 12587884 |
| 12558800 | 12571630 | 12585894 | 12587885 |
| 12558801 | 12573683 | 12585896 | 12587886 |
| 12558802 | 12574029 | 12585897 | 12587887 |
| 12558804 | 12574074 | 12585900 | 12587888 |
| 12558806 | 12574305 | 12585901 | 12587889 |
| 12558807 | 12576033 | 12587328 | 12587890 |
| 12558808 | 12576034 | 12587398 | 12587891 |
| 12558810 | 12576035 | 12587401 | 12587892 |
| 12558811 | 12576036 | 12587403 | 12587893 |
| 12558813 | 12576037 | 12587404 | 12587894 |
| 12558815 | 12576038 | 12587405 | 12587895 |
| 12558817 | 12576039 | 12587406 | 12587896 |
| 12558818 | 12576040 | 12587407 | 12587897 |
| 12558821 | 12576042 | 12587408 | 12587898 |
| 12558822 | 12576043 | 12587409 | 12587899 |
| 12558824 | 12576044 | 12587410 | 12587900 |
| 12558825 | 12576045 | 12587411 | 12587901 |
| 12558826 | 12576046 | 12587415 | 12587902 |
| 12558827 | 12576047 | 12587417 | 12587905 |
| 12558829 | 12576049 | 12587419 | 12587906 |
| 12558927 | 12576050 | 12587420 | 12589000 |
| 12559414 | 12576051 | 12587421 | 12589010 |
| 12559417 | 12576052 | 12587424 | 12589020 |
| 12559422 | 12576053 | 12587427 | 12589156 |
| 12559437 | 12576054 | 12587428 | 12589338 |
| 12559438 | 12576055 | 12587429 | 12589890 |
| 12559451 | 12576056 | 12587431 | 12590125 |
| 12559452 | 12576093 | 12587432 | 12590338 |
| 12559453 | 12576096 | 12587434 | 12590371 |
| 12559454 | 12576098 | 12587435 | 12590398 |
| 12559455 | 12576099 | 12587436 | 12590447 |
| 12559456 | 12576100 | 12587437 | 12592810 |
| 12559457 | 12576101 | 12587438 | 12593409 |
| 12559458 | 12576103 | 12587439 | 12594370 |



|          |          |          |          |
|----------|----------|----------|----------|
| 12594933 | 12607958 | 12610609 | 12636857 |
| 12595455 | 12607959 | 12610610 | 12637061 |
| 12595506 | 12607965 | 12610612 | 12637066 |
| 12595673 | 12607966 | 12610965 | 12637322 |
| 12596123 | 12607967 | 12610991 | 12637330 |
| 12596327 | 12607968 | 12610999 | 12638056 |
| 12596867 | 12607969 | 12612375 | 12638091 |
| 12597267 | 12607971 | 12612666 | 12638562 |
| 12600647 | 12607972 | 12613687 | 12638698 |
| 12601588 | 12607975 | 12613688 | 12638712 |
| 12604145 | 12607977 | 12613766 | 12638809 |
| 12605007 | 12607978 | 12618322 | 12638937 |
| 12605011 | 12607980 | 12619000 | 12638991 |
| 12605042 | 12607981 | 12620864 | 12639043 |
| 12605043 | 12607982 | 12621814 | 12639175 |
| 12605102 | 12607983 | 12621878 | 12640456 |
| 12605463 | 12607986 | 12622491 | 12640486 |
| 12605606 | 12607987 | 12622501 | 12640913 |
| 12605687 | 12607988 | 12623503 | 12642583 |
| 12605801 | 12607994 | 12624687 | 12642823 |
| 12606310 | 12607995 | 12624817 | 12643124 |
| 12606334 | 12607996 | 12626263 | 12643898 |
| 12606511 | 12608000 | 12626309 | 12644444 |
| 12606534 | 12609354 | 12627205 | 12644809 |
| 12606668 | 12609474 | 12628235 | 12644815 |
| 12606795 | 12609645 | 12628241 | 12644817 |
| 12606828 | 12610054 | 12628250 | 12644821 |
| 12606834 | 12610106 | 12628267 | 12644835 |
| 12606838 | 12610165 | 12628303 | 12644839 |
| 12606861 | 12610277 | 12629118 | 12644843 |
| 12606881 | 12610334 | 12629144 | 12644849 |
| 12606913 | 12610551 | 12629153 | 12644885 |
| 12607382 | 12610560 | 12629210 | 12644886 |
| 12607392 | 12610563 | 12629453 | 12647216 |
| 12607398 | 12610564 | 12629568 | 12647217 |
| 12607412 | 12610569 | 12629946 | 12647650 |
| 12607935 | 12610571 | 12630402 | 12647695 |
| 12607937 | 12610574 | 12630820 | 12647704 |
| 12607938 | 12610580 | 12630919 | 12648066 |
| 12607939 | 12610581 | 12630959 | 12648815 |
| 12607940 | 12610582 | 12632184 | 12648960 |
| 12607941 | 12610583 | 12632471 | 12648962 |
| 12607944 | 12610585 | 12632539 | 12649098 |
| 12607946 | 12610588 | 12633086 | 12649169 |
| 12607947 | 12610589 | 12633207 | 12651470 |
| 12607949 | 12610593 | 12636562 | 12651471 |
| 12607951 | 12610594 | 12636596 | 12651484 |
| 12607953 | 12610597 | 12636743 | 12651486 |
| 12607954 | 12610598 | 12636752 | 12651488 |
| 12607955 | 12610600 | 12636843 | 12651490 |

|          |          |          |          |
|----------|----------|----------|----------|
| 12651491 | 12652826 | 12673528 | 12695072 |
| 12651492 | 12652828 | 12673868 | 12695285 |
| 12651493 | 12652832 | 12673961 | 12696584 |
| 12651495 | 12652837 | 12674190 | 12698346 |
| 12651496 | 12652838 | 12674581 | 12698363 |
| 12651497 | 12652840 | 12675976 | 12698379 |
| 12651498 | 12652843 | 12677290 | 12698427 |
| 12651499 | 12652845 | 12677579 | 12698430 |
| 12651500 | 12652846 | 12679072 | 12698463 |
| 12651501 | 12652847 | 12679128 | 12698475 |
| 12651585 | 12652848 | 12679153 | 12698480 |
| 12651663 | 12652849 | 12679171 | 12698497 |
| 12651869 | 12653326 | 12679182 | 12698534 |
| 12651975 | 12653559 | 12679229 | 12698555 |
| 12652205 | 12653996 | 12680051 | 12698564 |
| 12652697 | 12654786 | 12680383 | 12698570 |
| 12652708 | 12654787 | 12682132 | 12698633 |
| 12652744 | 12654788 | 12682277 | 12698635 |
| 12652745 | 12655488 | 12682345 | 12698702 |
| 12652746 | 12657215 | 12682471 | 12698710 |
| 12652747 | 12657353 | 12683313 | 12699259 |
| 12652748 | 12659666 | 12683708 | 12699566 |
| 12652752 | 12659677 | 12685173 | 12699568 |
| 12652756 | 12659759 | 12687955 | 12699727 |
| 12652757 | 12660066 | 12687970 | 12699746 |
| 12652770 | 12660069 | 12688305 | 12699750 |
| 12652773 | 12660354 | 12688770 | 12699755 |
| 12652775 | 12660374 | 12688820 | 12699930 |
| 12652776 | 12660422 | 12688839 | 12700044 |
| 12652777 | 12660425 | 12689375 | 12700725 |
| 12652780 | 12660430 | 12689597 | 12700869 |
| 12652782 | 12660439 | 12689860 | 12701327 |
| 12652783 | 12660480 | 12689861 | 12701562 |
| 12652785 | 12660487 | 12690245 | 12701860 |
| 12652786 | 12660498 | 12692295 | 12701930 |
| 12652787 | 12660507 | 12693857 | 12701964 |
| 12652788 | 12665547 | 12694012 | 12702013 |
| 12652790 | 12665652 | 12694023 | 12702023 |
| 12652791 | 12667094 | 12694101 | 12702035 |
| 12652793 | 12670312 | 12694146 | 12702045 |
| 12652796 | 12670828 | 12694220 | 12703161 |
| 12652797 | 12671000 | 12694256 | 12704014 |
| 12652801 | 12671280 | 12694285 | 12704161 |
| 12652802 | 12671294 | 12694978 | 12704609 |
| 12652811 | 12671688 | 12694992 | 12705226 |
| 12652813 | 12672007 | 12695005 | 12705469 |
| 12652815 | 12672113 | 12695027 | 12705546 |
| 12652818 | 12672180 | 12695028 | 12705595 |
| 12652822 | 12672213 | 12695031 | 12705839 |
| 12652825 | 12673525 | 12695055 | 12705840 |

|          |          |          |  |
|----------|----------|----------|--|
| 12705842 | 12705920 | 12705999 |  |
| 12705843 | 12705921 | 12706002 |  |
| 12705844 | 12705922 | 12706004 |  |
| 12705845 | 12705923 | 12706005 |  |
| 12705847 | 12705934 | 12706007 |  |
| 12705848 | 12705936 | 12706008 |  |
| 12705852 | 12705937 | 12706344 |  |
| 12705853 | 12705938 | 12706359 |  |
| 12705854 | 12705939 | 12706389 |  |
| 12705855 | 12705940 | 12706401 |  |
| 12705856 | 12705941 | 12706680 |  |
| 12705857 | 12705942 | 12706846 |  |
| 12705858 | 12705943 | 12708421 |  |
| 12705859 | 12705944 | 12708740 |  |
| 12705860 | 12705945 | 12709399 |  |
| 12705861 | 12705946 |          |  |
| 12705862 | 12705947 |          |  |
| 12705863 | 12705949 |          |  |
| 12705865 | 12705951 |          |  |
| 12705867 | 12705952 |          |  |
| 12705868 | 12705953 |          |  |
| 12705869 | 12705954 |          |  |
| 12705870 | 12705955 |          |  |
| 12705871 | 12705956 |          |  |
| 12705872 | 12705958 |          |  |
| 12705873 | 12705959 |          |  |
| 12705877 | 12705961 |          |  |
| 12705879 | 12705964 |          |  |
| 12705880 | 12705965 |          |  |
| 12705884 | 12705966 |          |  |
| 12705886 | 12705967 |          |  |
| 12705888 | 12705968 |          |  |
| 12705889 | 12705969 |          |  |
| 12705890 | 12705970 |          |  |
| 12705891 | 12705971 |          |  |
| 12705892 | 12705972 |          |  |
| 12705894 | 12705973 |          |  |
| 12705895 | 12705976 |          |  |
| 12705896 | 12705978 |          |  |
| 12705897 | 12705979 |          |  |
| 12705899 | 12705981 |          |  |
| 12705906 | 12705983 |          |  |
| 12705909 | 12705985 |          |  |
| 12705910 | 12705990 |          |  |
| 12705911 | 12705991 |          |  |
| 12705912 | 12705992 |          |  |
| 12705916 | 12705993 |          |  |
| 12705917 | 12705995 |          |  |
| 12705918 | 12705996 |          |  |
| 12705919 | 12705997 |          |  |

**Supplementary Table S4.** Accession numbers for the SARS-CoV-2 BA.5 sequences under study.

|          |          |          |          |
|----------|----------|----------|----------|
| 11017528 | 12097321 | 12252681 | 12289904 |
| 11542465 | 12097324 | 12267757 | 12289911 |
| 11542604 | 12097361 | 12268493 | 12289935 |
| 11674786 | 12097362 | 12268496 | 12290004 |
| 11763507 | 12097378 | 12268499 | 12290110 |
| 11763512 | 12097383 | 12268503 | 12291987 |
| 11763513 | 12097392 | 12268509 | 12293136 |
| 11763514 | 12097395 | 12268513 | 12300640 |
| 11763515 | 12097397 | 12268514 | 12307546 |
| 11763516 | 12097401 | 12273993 | 12307549 |
| 11763528 | 12097405 | 12273999 | 12307553 |
| 11763529 | 12097406 | 12274002 | 12307557 |
| 11763530 | 12097407 | 12274018 | 12307576 |
| 11763533 | 12097408 | 12274046 | 12307609 |
| 11763534 | 12097409 | 12274070 | 12307612 |
| 11763535 | 12097410 | 12278969 | 12307619 |
| 11763536 | 12112497 | 12278971 | 12307629 |
| 11817426 | 12113187 | 12278976 | 12307647 |
| 11818312 | 12114808 | 12278977 | 12307652 |
| 11867415 | 12127266 | 12278982 | 12307654 |
| 11867511 | 12127267 | 12278983 | 12307662 |
| 11903041 | 12127324 | 12278987 | 12307666 |
| 11903042 | 12127327 | 12278990 | 12307671 |
| 11903043 | 12127412 | 12278992 | 12307676 |
| 11903044 | 12127418 | 12278993 | 12307684 |
| 11903045 | 12127420 | 12278995 | 12307685 |
| 11903046 | 12127435 | 12281109 | 12307693 |
| 11903047 | 12127456 | 12281146 | 12307695 |
| 11903048 | 12127463 | 12282421 | 12307707 |
| 11903049 | 12151839 | 12282880 | 12307710 |
| 11903051 | 12181265 | 12283695 | 12307717 |
| 11903052 | 12181267 | 12288598 | 12311863 |
| 11903062 | 12187584 | 12288613 | 12315631 |
| 11903064 | 12187920 | 12289676 | 12317782 |
| 11992074 | 12188629 | 12289678 | 12333300 |
| 11999060 | 12188650 | 12289715 | 12334086 |
| 12011087 | 12188674 | 12289723 | 12334817 |
| 12012871 | 12188680 | 12289728 | 12334819 |
| 12012890 | 12190233 | 12289733 | 12339573 |
| 12012905 | 12190609 | 12289737 | 12346538 |
| 12012919 | 12194677 | 12289738 | 12348018 |
| 12014443 | 12195043 | 12289741 | 12348900 |
| 12029894 | 12207803 | 12289748 | 12350567 |
| 12043282 | 12210559 | 12289761 | 12350568 |
| 12043290 | 12211144 | 12289865 | 12350571 |
| 12063903 | 12211851 | 12289870 | 12354933 |
| 12063929 | 12212221 | 12289873 | 12355213 |
| 12085863 | 12216342 | 12289899 | 12356895 |
| 12085895 | 12224559 | 12289901 | 12356943 |
| 12097320 | 12237160 | 12289903 | 12357300 |

|          |          |          |          |
|----------|----------|----------|----------|
| 12358680 | 12440237 | 12477009 | 12520746 |
| 12358695 | 12442758 | 12477012 | 12520888 |
| 12359690 | 12456712 | 12477016 | 12520982 |
| 12359716 | 12457428 | 12477017 | 12523344 |
| 12360010 | 12464658 | 12477018 | 12523570 |
| 12360686 | 12464660 | 12477020 | 12523699 |
| 12361163 | 12464668 | 12477039 | 12525869 |
| 12361382 | 12464676 | 12477378 | 12525871 |
| 12361559 | 12464678 | 12477386 | 12525877 |
| 12395556 | 12464680 | 12477408 | 12525879 |
| 12396824 | 12464685 | 12477450 | 12525880 |
| 12401036 | 12464700 | 12477516 | 12525881 |
| 12401038 | 12464769 | 12477557 | 12525887 |
| 12401042 | 12464772 | 12477592 | 12525888 |
| 12401044 | 12464774 | 12477595 | 12525891 |
| 12401046 | 12464776 | 12478418 | 12525895 |
| 12401048 | 12464782 | 12489816 | 12525909 |
| 12401049 | 12464824 | 12490240 | 12526117 |
| 12401077 | 12464847 | 12490468 | 12526672 |
| 12401080 | 12464893 | 12490598 | 12526675 |
| 12401081 | 12464905 | 12490829 | 12526758 |
| 12401107 | 12464920 | 12492164 | 12526974 |
| 12401123 | 12464927 | 12495201 | 12527102 |
| 12401126 | 12464928 | 12502938 | 12527337 |
| 12401131 | 12464930 | 12503210 | 12528735 |
| 12401133 | 12465068 | 12513180 | 12528955 |
| 12401142 | 12465077 | 12513244 | 12529089 |
| 12401145 | 12465086 | 12514451 | 12534973 |
| 12401150 | 12465112 | 12514552 | 12534974 |
| 12401153 | 12465862 | 12514771 | 12534980 |
| 12401154 | 12469529 | 12515490 | 12535004 |
| 12401158 | 12469675 | 12515717 | 12540781 |
| 12401161 | 12469711 | 12516495 | 12543177 |
| 12401163 | 12472550 | 12517340 | 12546671 |
| 12401168 | 12473106 | 12517523 | 12546886 |
| 12401169 | 12473599 | 12517547 | 12546954 |
| 12401171 | 12473602 | 12517692 | 12547382 |
| 12406393 | 12473610 | 12517818 | 12548500 |
| 12426941 | 12473869 | 12518111 | 12549316 |
| 12426978 | 12473876 | 12518135 | 12557301 |
| 12431299 | 12474422 | 12518145 | 12557593 |
| 12431300 | 12474442 | 12519251 | 12557952 |
| 12431301 | 12474447 | 12519392 | 12558341 |
| 12431302 | 12474460 | 12519821 | 12558791 |
| 12431303 | 12474466 | 12519998 | 12558798 |
| 12431317 | 12474467 | 12520002 | 12558803 |
| 12434881 | 12474471 | 12520013 | 12558812 |
| 12434896 | 12474473 | 12520047 | 12558816 |
| 12434927 | 12474479 | 12520053 | 12558820 |
| 12439885 | 12476995 | 12520056 | 12558828 |

|          |          |          |          |
|----------|----------|----------|----------|
| 12559411 | 12570864 | 12591440 | 12598764 |
| 12559412 | 12570868 | 12595717 | 12598765 |
| 12559413 | 12570894 | 12595730 | 12598766 |
| 12559416 | 12570895 | 12597022 | 12598768 |
| 12559418 | 12570901 | 12598476 | 12598772 |
| 12559419 | 12571623 | 12598500 | 12598774 |
| 12559420 | 12571625 | 12598502 | 12598775 |
| 12559421 | 12571626 | 12598527 | 12598780 |
| 12559423 | 12571628 | 12598539 | 12598781 |
| 12559424 | 12571629 | 12598542 | 12598782 |
| 12559425 | 12574125 | 12598547 | 12598787 |
| 12559427 | 12576041 | 12598548 | 12598788 |
| 12559428 | 12576073 | 12598551 | 12598791 |
| 12559429 | 12576074 | 12598553 | 12598792 |
| 12559430 | 12576075 | 12598554 | 12598798 |
| 12559431 | 12576077 | 12598555 | 12598799 |
| 12559432 | 12576080 | 12598557 | 12598803 |
| 12559433 | 12576083 | 12598558 | 12598815 |
| 12559434 | 12576084 | 12598560 | 12598825 |
| 12559435 | 12576097 | 12598561 | 12598834 |
| 12559436 | 12582143 | 12598567 | 12598869 |
| 12559439 | 12585604 | 12598587 | 12598872 |
| 12559440 | 12585864 | 12598594 | 12598908 |
| 12559441 | 12585887 | 12598618 | 12598935 |
| 12559442 | 12585892 | 12598637 | 12598936 |
| 12559444 | 12587418 | 12598643 | 12598945 |
| 12559445 | 12587422 | 12598646 | 12598949 |
| 12559446 | 12587426 | 12598656 | 12598963 |
| 12559448 | 12587440 | 12598675 | 12598965 |
| 12561198 | 12587441 | 12598704 | 12598980 |
| 12561199 | 12587450 | 12598705 | 12605106 |
| 12561210 | 12587876 | 12598715 | 12606114 |
| 12561211 | 12587877 | 12598723 | 12606165 |
| 12561212 | 12587883 | 12598726 | 12606170 |
| 12561213 | 12587903 | 12598730 | 12606358 |
| 12562014 | 12587904 | 12598736 | 12606368 |
| 12563489 | 12588374 | 12598738 | 12606501 |
| 12563943 | 12588803 | 12598739 | 12606698 |
| 12565762 | 12589272 | 12598741 | 12606965 |
| 12565792 | 12589340 | 12598743 | 12607074 |
| 12565942 | 12589393 | 12598748 | 12607952 |
| 12567679 | 12589394 | 12598749 | 12607956 |
| 12567712 | 12589398 | 12598750 | 12607974 |
| 12568859 | 12589400 | 12598752 | 12607984 |
| 12568880 | 12589402 | 12598753 | 12607997 |
| 12568930 | 12589404 | 12598756 | 12607998 |
| 12570652 | 12589405 | 12598757 | 12609307 |
| 12570776 | 12589406 | 12598758 | 12610548 |
| 12570845 | 12589408 | 12598761 | 12610549 |
| 12570849 | 12590612 | 12598762 | 12610552 |

|          |          |          |          |
|----------|----------|----------|----------|
| 12610557 | 12637237 | 12671167 | 12688263 |
| 12610561 | 12637250 | 12672524 | 12688266 |
| 12610572 | 12638367 | 12672529 | 12688267 |
| 12610573 | 12638474 | 12672566 | 12688835 |
| 12610587 | 12639017 | 12672591 | 12689598 |
| 12610592 | 12640425 | 12673390 | 12690265 |
| 12610595 | 12641024 | 12673414 | 12690576 |
| 12610602 | 12642590 | 12673606 | 12694033 |
| 12610605 | 12642820 | 12674056 | 12694237 |
| 12610608 | 12642821 | 12674280 | 12694282 |
| 12611442 | 12642824 | 12674286 | 12694985 |
| 12611590 | 12642829 | 12674332 | 12694988 |
| 12615486 | 12643339 | 12674577 | 12694991 |
| 12620608 | 12644727 | 12674661 | 12694993 |
| 12620609 | 12644818 | 12674669 | 12694994 |
| 12620611 | 12647435 | 12674677 | 12694995 |
| 12620614 | 12647486 | 12674681 | 12694996 |
| 12620642 | 12647508 | 12675136 | 12694997 |
| 12620786 | 12648721 | 12675185 | 12694998 |
| 12620815 | 12649069 | 12675204 | 12694999 |
| 12620848 | 12650406 | 12675291 | 12695001 |
| 12621327 | 12651494 | 12675523 | 12695002 |
| 12621507 | 12652754 | 12675627 | 12695003 |
| 12623188 | 12652758 | 12675653 | 12695004 |
| 12628220 | 12652759 | 12675796 | 12695006 |
| 12628227 | 12652769 | 12675883 | 12695007 |
| 12629136 | 12652799 | 12675969 | 12695008 |
| 12629161 | 12652817 | 12676008 | 12695009 |
| 12629178 | 12652841 | 12676116 | 12695010 |
| 12629451 | 12653062 | 12676357 | 12695011 |
| 12629491 | 12653641 | 12676625 | 12695012 |
| 12629930 | 12654529 | 12677099 | 12695013 |
| 12630040 | 12655180 | 12677333 | 12695016 |
| 12630291 | 12655363 | 12677347 | 12695017 |
| 12630456 | 12655572 | 12677371 | 12695018 |
| 12630492 | 12655967 | 12677397 | 12695019 |
| 12630539 | 12657253 | 12677438 | 12695020 |
| 12630738 | 12657356 | 12677458 | 12695021 |
| 12632483 | 12658243 | 12677468 | 12695022 |
| 12632509 | 12658266 | 12677693 | 12695023 |
| 12632568 | 12659704 | 12677748 | 12695026 |
| 12633005 | 12660362 | 12677777 | 12695029 |
| 12633212 | 12660377 | 12678043 | 12695071 |
| 12635851 | 12665900 | 12678057 | 12695073 |
| 12635951 | 12666681 | 12678310 | 12696267 |
| 12635953 | 12666729 | 12678459 | 12698523 |
| 12636044 | 12666860 | 12678893 | 12698536 |
| 12636091 | 12667361 | 12678905 | 12698760 |
| 12636432 | 12670050 | 12685224 | 12698762 |
| 12636801 | 12671029 | 12686451 | 12698780 |

|          |          |  |  |
|----------|----------|--|--|
| 12699044 | 12705957 |  |  |
| 12699047 | 12705960 |  |  |
| 12699052 | 12705962 |  |  |
| 12699057 | 12705963 |  |  |
| 12699059 | 12705975 |  |  |
| 12699138 | 12705988 |  |  |
| 12699139 | 12705994 |  |  |
| 12699263 | 12705998 |  |  |
| 12699426 | 12706001 |  |  |
| 12699516 | 12706006 |  |  |
| 12699555 | 12706810 |  |  |
| 12699613 | 12707544 |  |  |
| 12699651 | 12707642 |  |  |
| 12699895 | 12707749 |  |  |
| 12699943 | 12708520 |  |  |
| 12699989 | 12708585 |  |  |
| 12700109 |          |  |  |
| 12701260 |          |  |  |
| 12701336 |          |  |  |
| 12701484 |          |  |  |
| 12701993 |          |  |  |
| 12703369 |          |  |  |
| 12703370 |          |  |  |
| 12703371 |          |  |  |
| 12703372 |          |  |  |
| 12703373 |          |  |  |
| 12703375 |          |  |  |
| 12704095 |          |  |  |
| 12704229 |          |  |  |
| 12704254 |          |  |  |
| 12704285 |          |  |  |
| 12704369 |          |  |  |
| 12705536 |          |  |  |
| 12705838 |          |  |  |
| 12705841 |          |  |  |
| 12705850 |          |  |  |
| 12705851 |          |  |  |
| 12705875 |          |  |  |
| 12705876 |          |  |  |
| 12705881 |          |  |  |
| 12705882 |          |  |  |
| 12705883 |          |  |  |
| 12705885 |          |  |  |
| 12705898 |          |  |  |
| 12705901 |          |  |  |
| 12705903 |          |  |  |
| 12705904 |          |  |  |
| 12705907 |          |  |  |
| 12705913 |          |  |  |
| 12705935 |          |  |  |
